# Supplementary material for: Meta-analysis of Plasmodium falciparum var Signatures Contributing to Severe Malaria in African Children and Indian Adults
Source: PubMed Central journal article supplement (PMC6495371; doi:10.1128/mbio.00217-19), 2019-04-30
Supplement: mBio.00217-19-st002.pdf [file mBio.00217-19-st002.pdf]

**Table S2.** Broad phenotypic classification of domains targeted by individual *var* primers and associated color scheme

| Category                                  | DC | Current name                          | Color                |
|-------------------------------------------|----|---------------------------------------|----------------------|
| CD36                                      |    | CIDR $\alpha$ .3.1-3                  | Orange               |
| CD36                                      |    | CIDR $\alpha$ 2.2                     |                      |
| CD36                                      |    | CIDR $\alpha$ 2.3/5/6/7/9/10          |                      |
| CD36                                      | 19 | CIDR $\alpha$ 3.4 of DC19             |                      |
| CD36                                      |    | DBL $\alpha$ .0.1                     |                      |
| CD36                                      | 19 | DBL $\alpha$ 0.16 of DC19             |                      |
| CD36                                      |    | DBL $\alpha$ 0.6/9                    |                      |
| CD36                                      | 20 | DBL $\alpha$ 0.9 of DC20              |                      |
| C-terminal CIDR                           |    | CIDR $\gamma$                         | Light Green          |
| C-terminal CIDR                           |    | CIDR $\gamma$ 1/2                     |                      |
| C-terminal CIDR                           |    | CIDR $\gamma$ 2.9                     |                      |
| C-terminal DBL                            | 12 | DBL $\epsilon$ 12 of DC12             | Green                |
| C-terminal DBL                            | 7  | DBL $\epsilon$ 2 of DC7               |                      |
| C-terminal DBL                            | 7  | DBL $\epsilon$ 3 of DC7               |                      |
| C-terminal DBL                            | 6  | DBL $\zeta$ 5 of DC6                  |                      |
| C-terminal DBL                            | 6  | DBL $\zeta$ 5.3 of DC6                |                      |
| C-terminal DBL                            | 9  | DBL $\gamma$ of DC9                   |                      |
| C-terminal DBL                            | 9  | DBL $\gamma$ 9                        |                      |
| C-terminal DBL                            | 9  | DBL $\zeta$ 4 of DC9                  |                      |
| C-terminal DBL                            | 10 | DBL $\zeta$ 6 of DC10                 |                      |
| EPCR all                                  |    | CIDR $\alpha$ 1.4 and CIDR $\alpha$ 1 |                      |
| EPCR all                                  |    | DBL $\alpha$ 2/ $\alpha$ 1.1/2/4/7    |                      |
| EPCR DC8                                  | 8  | CIDR $\alpha$ 1.1 of DC8              | Cyan                 |
| EPCR DC8                                  | 8  | DBL $\alpha$ -CIDR $\alpha$ of DC8    |                      |
| EPCR DC8                                  | 8  | DBL $\beta$ 12 and DBL $\beta$ 3.5    |                      |
| EPCR DC8                                  | 8  | DBL $\gamma$ 4/6 of DC8               |                      |
| EPCR Group A                              | 13 | CIDR $\alpha$ 1.4 of DC13             | Dark Blue            |
| EPCR Group A                              |    | CIDR $\alpha$ 1.6                     |                      |
| EPCR Group A                              |    | CIDR $\alpha$ 1.7                     |                      |
| EPCR Group A                              |    | DBL $\alpha$ 1.4                      |                      |
| EPCR Group A                              | 13 | DBL $\alpha$ 1.7 of DC13              |                      |
| Group A Rosetting/ EPCR/ PECAM-1/ Unknown |    | DBL $\alpha$ not var3                 | Yellow-Blue Gradient |
| ICAM-1                                    |    | DBL $\beta$ 3                         | Purple               |
| ICAM-1                                    |    | DBL $\beta$ 5                         |                      |
| Unknown / Rosetting                       | 16 | CIDR $\delta$ of DC16                 | Yellow               |
| Unknown / Rosetting                       | 16 | DBL $\alpha$ 1.5/6b of DC16           |                      |
| Unknown / Rosetting                       | 16 | DBL $\alpha$ 1.5/6a of DC16           |                      |
| Unknown / PECAM-1                         | 5  | DBL $\beta$ 7 & 9 of DC5              | Pink                 |
| Unknown / PECAM-1                         | 5  | DBL $\gamma$ of DC5                   |                      |
| Unknown phenotype                         | 1  | DBL $\alpha$ 1.1 of DC1               | Grey                 |
| Unknown phenotype                         | 3  | DBL $\epsilon$ 8 of DC3               |                      |
